# Supplementary material for: Integrating Pharmacogenomics Data-Driven Computational Drug Prediction with Single-Cell RNAseq to Demonstrate the Efficacy of a NAMPT Inhibitor against Aggressive, Taxane-Resistant, and Stem-like Cells in Lethal Prostate Cancer
Source: MDPI journal article supplement (doi:10.3390/cancers14236009), 2022-12-06
Supplement: s1 [file s1]

**Table S1.** List of Drugs, reagents, antibodies, and kits.

| Reagents                                                           | Manufacturer                            | Location           |
|--------------------------------------------------------------------|-----------------------------------------|--------------------|
| Fetal bovine serum (FBS)                                           | Hyclone (Thermo Fisher Scientific Inc.) | Rockford, IL, USA  |
| Trypsin (0.25% w/v)                                                | Hyclone (Thermo Fisher Scientific Inc.) | Rockford, IL, USA  |
| Penicillin-Streptomycin (10,000 U/mL)                              | Gibco™ (Thermo Fisher Scientific Inc.)  | Waltham, MA, USA   |
| Docetaxel                                                          | Selleck Chemicals LLC                   | Houston, TX, USA   |
| Cabazitaxel                                                        | Selleck Chemicals LLC                   | Houston, TX, USA   |
| FK866                                                              | Selleck Chemicals LLC                   | Houston, TX, USA   |
| FITC Annexin V Apoptosis Detection Kit                             | BD Biosciences                          | San Jose, CA, USA  |
| FxCycle™ PI/RNase Staining Solution kit                            | Thermo Fisher Scientific Inc.           | Waltham, MA, USA   |
| RIPA lysis buffer                                                  | Thermo Fisher Scientific Inc.           | Waltham, MA, USA   |
| Protease Inhibitor Cocktail                                        | Thermo Fisher Scientific Inc.           | Waltham, MA, USA   |
| Phosphatase Inhibitor                                              | Thermo Fisher Scientific Inc.           | Waltham, MA, USA   |
| Pierce™ ECL Western Blotting Substrate                             | Thermo Fisher Scientific Inc.           | Waltham, MA, USA   |
| HES-1 specific primer Hs00172878_m1                                | Thermo Fisher Scientific Inc.           | Waltham, MA, USA   |
| TaqMan Gene Expression Assays                                      | Thermo Fisher Scientific Inc.           | Waltham, MA, USA   |
| Vybrant™ DyeCycle™ Violet Stain                                    | Thermo Fisher Scientific Inc.           | Waltham, MA, USA   |
| CM-H2DCFDA (General Oxidative Stress Indicator)                    | Thermo Fisher Scientific Inc.           | Waltham, MA, USA   |
| NucBlue™ Live ReadyProbes™ Reagent (Hoechst 33342)                 | Thermo Fisher Scientific Inc.           | Waltham, MA, USA   |
| RNeasy Plus Mini Kit                                               | QIAGEN                                  | Hilden, Germany    |
| QuantiTect Reverse Transcription Kit                               | QIAGEN                                  | Hilden, Germany    |
| Quick Start Bovine Serum Albumin Standard                          | Bio-Rad                                 | Hercules, CA, USA  |
| Tris Buffer Saline (TBS)                                           | Bio-Rad                                 | Hercules, CA, USA  |
| 10% Tween 20                                                       | Bio-Rad                                 | Hercules, CA, USA  |
| Polyvinylidene fluoride membrane (PVDF)                            | EMD Millipore                           | Billerica, MA, USA |
| Bovine Serum Albumin (BSA)                                         | VWR                                     | Radnor, PA, USA    |
| 3-(4,5-dimethylthiazol-2-yl)-2,5-diphenyltetrazolium bromide (MTT) | Sigma-Aldrich Inc                       | St. Louis, MO, USA |
| Dimethyl sulfoxide (DMSO)                                          | Sigma-Aldrich Inc                       | St. Louis, MO, USA |
| 2',7'-Dichlorofluorescein diacetate (DCFDA)                        | Sigma-Aldrich Inc                       | St. Louis, MO, USA |
| Bradford Reagent                                                   | Sigma-Aldrich Inc                       | St. Louis, MO, USA |
| NAD/NADH-Glo™ Assay Kit (NAMPT activity)                           | Promega Corp.                           | Madison, WI, USA   |
| JC-1 - Mitochondrial Membrane Potential Assay Kit                  | Abcam                                   | Waltham, MA, USA   |
| NAMPT (86634S)                                                     | Cell Signaling Technology               | Danvers, MA, USA   |

---

|                                              |                           |                    |
|----------------------------------------------|---------------------------|--------------------|
| Becline-1 (3495S)                            | Cell Signaling Technology | Danvers, MA, USA   |
| HES1 (11988S)                                | Cell Signaling Technology | Danvers, MA, USA   |
| CD44 (3570T)                                 | Cell Signaling Technology | Danvers, MA, USA   |
| Cleave-caspase 9 (9505T)                     | Cell Signaling Technology | Danvers, MA, USA   |
| Cleave-caspase 3 (9661T)                     | Cell Signaling Technology | Danvers, MA, USA   |
| ATF-4 (11815S)                               | Cell Signaling Technology | Danvers, MA, USA   |
| Anti-rabbit IgG, HRP-linked Antibody (7074S) | Cell Signaling Technology | Danvers, MA, USA   |
| β-actin (A3854)                              | Sigma-Aldrich Inc         | St. Louis, MO, USA |

**Table S2.** Top differentially expressed genes (DEGs) (fold change compared to untreated) following 48 h of Fk866, FK866+DTX and DTX treatment in PC-3, PC-3M and DU145 (AI-mCRPC/NEPC) cell lines (Fold change >2;  $p < 0.05$ ).

| Gene         | 3nM FK866 |             | 18nM DTX + 3nM FK866 |             | 18nM DTX |             |
|--------------|-----------|-------------|----------------------|-------------|----------|-------------|
|              | P value   | Fold change | P value              | Fold change | P value  | Fold change |
| C1S          | 6.59E-03  | -7.95       | NA                   | NA          | NA       | NA          |
| IFITM3       | 3.17E-02  | -6.90       | NA                   | NA          | NA       | NA          |
| FAM229A      | 7.60E-03  | -5.24       | 4.11E-02             | -3.22       | NA       | NA          |
| LHFPL5       | 9.81E-03  | -5.17       | NA                   | NA          | NA       | NA          |
| DUS4L-BCAP29 | 2.80E-02  | -4.60       | NA                   | NA          | NA       | NA          |
| ZACN         | 2.35E-02  | -4.53       | NA                   | NA          | NA       | NA          |
| LGALS3BP     | 2.39E-03  | -4.28       | 7.15E-03             | -3.18       | NA       | NA          |
| CXCL2        | 4.71E-02  | -3.93       | NA                   | NA          | NA       | NA          |
| HES1         | 1.62E-03  | -3.84       | 1.54E-04             | -5.96       | 2.24E-03 | -3.29       |
| FAS          | 2.09E-02  | -3.60       | NA                   | NA          | NA       | NA          |
| LY6G5B       | 4.27E-02  | -3.58       | 3.17E-02             | -4.50       | NA       | NA          |
| CDRT4        | 2.14E-02  | -3.53       | NA                   | NA          | NA       | NA          |
| MAT2A        | 3.58E-02  | -3.51       | 4.56E-02             | -3.23       | NA       | NA          |
| ZC3H12A      | 6.56E-03  | -3.23       | NA                   | NA          | NA       | NA          |
| IL18BP       | 8.62E-03  | -3.16       | NA                   | NA          | NA       | NA          |
| PRSS53       | 1.11E-02  | -3.10       | NA                   | NA          | NA       | NA          |
| PILRB        | 2.08E-02  | -3.06       | NA                   | NA          | NA       | NA          |
| IGFLR1       | 3.73E-02  | -3.04       | NA                   | NA          | NA       | NA          |
| ABCA1        | 2.30E-02  | -2.87       | NA                   | NA          | 2.44E-02 | -2.49       |
| LTB4R        | 7.37E-03  | -2.79       | 5.60E-03             | -3.19       | NA       | NA          |
| UBXN11       | 4.59E-04  | -2.75       | NA                   | NA          | NA       | NA          |
| NSUN5P2      | 6.42E-03  | -2.70       | 3.54E-03             | -3.22       | NA       | NA          |
| RASL11A      | 4.66E-02  | -2.69       | NA                   | NA          | NA       | NA          |
| RNF207       | 2.01E-02  | -2.64       | NA                   | NA          | NA       | NA          |
| ZNF789       | 1.62E-02  | -2.61       | NA                   | NA          | NA       | NA          |
| TERT         | 3.50E-02  | -2.57       | NA                   | NA          | NA       | NA          |
| NAIP         | 6.45E-03  | -2.56       | NA                   | NA          | NA       | NA          |
| MOK          | 3.97E-03  | -2.54       | NA                   | NA          | NA       | NA          |
| BSCL2        | 9.00E-03  | -2.51       | NA                   | NA          | NA       | NA          |
| VAMP1        | 3.80E-03  | -2.49       | NA                   | NA          | NA       | NA          |
| PPIH         | 2.61E-03  | -2.48       | NA                   | NA          | NA       | NA          |
| STK26        | 1.62E-02  | 2.50        | NA                   | NA          | NA       | NA          |
| GABARAPL1    | 2.17E-02  | 2.50        | NA                   | NA          | NA       | NA          |
| NCR3LG1      | 1.92E-02  | 2.50        | NA                   | NA          | NA       | NA          |
| RB1CC1       | 4.59E-04  | 2.51        | NA                   | NA          | NA       | NA          |
| CPLANE2      | 1.91E-02  | 2.58        | NA                   | NA          | NA       | NA          |

|                  |          |      |          |      |    |    |
|------------------|----------|------|----------|------|----|----|
| TRAPPC6B         | 4.88E-02 | 2.63 | NA       | NA   | NA | NA |
| WDR31            | 8.77E-03 | 2.66 | NA       | NA   | NA | NA |
| TBCK             | 2.76E-03 | 2.69 | NA       | NA   | NA | NA |
| ASNS             | 5.57E-03 | 2.80 | NA       | NA   | NA | NA |
| OTUB2            | 4.99E-03 | 2.87 | NA       | NA   | NA | NA |
| OTUD1            | 2.10E-02 | 2.88 | NA       | NA   | NA | NA |
| TVP23C-<br>CDRT4 | 7.40E-03 | 2.90 | NA       | NA   | NA | NA |
| SYNE3            | 1.50E-02 | 2.93 | NA       | NA   | NA | NA |
| PITPNC1          | 8.92E-03 | 2.97 | 5.92E-03 | 3.29 | NA | NA |
| ADM2             | 4.08E-02 | 2.98 | NA       | NA   | NA | NA |
| MOCOS            | 3.40E-02 | 3.02 | NA       | NA   | NA | NA |
| CHAC1            | 1.25E-03 | 3.18 | NA       | NA   | NA | NA |
| JPH1             | 2.26E-02 | 3.26 | NA       | NA   | NA | NA |
| ELMOD1           | 4.25E-02 | 3.35 | NA       | NA   | NA | NA |
| SESN3            | 3.85E-02 | 3.40 | NA       | NA   | NA | NA |
| CYP1A1           | 2.64E-02 | 3.72 | NA       | NA   | NA | NA |
| DDIT4            | 2.17E-03 | 3.87 | NA       | NA   | NA | NA |
| SLC7A11          | 5.16E-03 | 4.08 | NA       | NA   | NA | NA |
| FTCDNL1          | 1.28E-02 | 4.12 | NA       | NA   | NA | NA |
| LAMP3            | 4.16E-02 | 4.47 | NA       | NA   | NA | NA |
| BHLHA15          | 2.14E-02 | 5.30 | NA       | NA   | NA | NA |
| PAPPA2           | 4.78E-02 | 6.27 | NA       | NA   | NA | NA |
| EML5             | 8.91E-03 | 7.23 | NA       | NA   | NA | NA |

Table S3. Prostate cancer patient dataset details.

| Sample name | Patient ID  | age  | race | Biochemical<br>Recurrence_BCR | Gleason<br>Score | pSpTage |
|-------------|-------------|------|------|-------------------------------|------------------|---------|
| GSM1323647  | MCC-PT081   | 78   | W    | 0                             | 7                | pT3     |
| GSM1323648  | MCC-PT127   | 61   | W    | 0                             | 6                | pT2     |
| GSM1323649  | MCC-PT168   | 63   | W    | 0                             | 6                | pT2     |
| GSM1323650  | MCC-PT184   | 58   | NA   | 0                             | 7                | pT3     |
| GSM1323651  | MCC-PT199   | 57   | W    | 0                             | 7                | pT2     |
| GSM1323652  | MCC-PT236   | 54   | W    | 0                             | 7                | pT2     |
| GSM1323653  | MCC-PT243   | 43   | NA   | 0                             | 7                | pT2     |
| GSM1323654  | UTPC008     | 57   | NA   | 0                             | 7                | pT1C    |
| GSM1323655  | UTPC020     | 66   | NA   | 0                             | 8                | pT2B    |
| GSM1323656  | UTPC107     | 50   | NA   | 0                             | 6                | pT1C    |
| GSM1323657  | UTPC162     | 69   | NA   | 0                             | 7                | pT1C    |
| GSM1323658  | VA-PC-00-87 | 68.8 | B    | 0                             | 7                | pT2C    |
| GSM1323659  | VA-PC-00-90 | 55.6 | B    | 0                             | 7                | pT2     |
| GSM1323660  | VA-PC-00-91 | 62.1 | W    | 0                             | 7                | pT2C    |

|            |             |      |    |   |   |      |
|------------|-------------|------|----|---|---|------|
| GSM1323661 | VA-PC-00-92 | 63.1 | B  | 0 | 8 | pT3A |
| GSM1323662 | VA-PC-00-93 | 52.5 | W  | 0 | 7 | pT2A |
| GSM1323663 | VA-PC-00-94 | 62.4 | B  | 0 | 7 | pT3A |
| GSM1323664 | VA-PC-00-95 | 69   | B  | 0 | 7 | pT2C |
| GSM1323665 | VA-PC-00-97 | 51.4 | W  | 0 | 6 | pT2C |
| GSM1323666 | VA-PC-00-98 | 68.4 | W  | 0 | 7 | pT2C |
| GSM1323667 | VA-PC-91-61 | 56.6 | W  | 0 | 7 | pT2C |
| GSM1323668 | VA-PC-91-62 | 63.8 | W  | 0 | 8 | pT2C |
| GSM1323669 | VA-PC-91-64 | 69.1 | W  | 0 | 7 | pT2C |
| GSM1323670 | VA-PC-92-13 | 64.9 | W  | 0 | 7 | pT2A |
| GSM1323671 | VA-PC-92-14 | 70.2 | W  | 0 | 7 | pT2C |
| GSM1323672 | VA-PC-92-66 | 65.1 | W  | 0 | 7 | pT2  |
| GSM1323673 | VA-PC-92-67 | 66.6 | W  | 0 | 7 | pT2  |
| GSM1323674 | VA-PC-93-19 | 64.1 | W  | 0 | 7 | pT2A |
| GSM1323675 | VA-PC-93-68 | 61.3 | W  | 0 | 7 | pT2C |
| GSM1323676 | VA-PC-94-28 | 56.3 | B  | 0 | 7 | pT2C |
| GSM1323677 | VA-PC-94-70 | 69.6 | B  | 0 | 7 | pT3A |
| GSM1323678 | VA-PC-96-45 | 50.4 | W  | 0 | 7 | pT3A |
| GSM1323679 | VA-PC-97-47 | 53.7 | W  | 0 | 7 | pT2C |
| GSM1323680 | VA-PC-97-48 | 50   | B  | 0 | 7 | pT2C |
| GSM1323681 | VA-PC-97-49 | 64.2 | W  | 0 | 6 | pT2A |
| GSM1323682 | VA-PC-97-50 | 60.5 | W  | 0 | 7 | pT2A |
| GSM1323683 | VA-PC-97-51 | 57.3 | B  | 0 | 7 | pT2B |
| GSM1323684 | VA-PC-97-52 | 64   | W  | 0 | 7 | pT2C |
| GSM1323685 | VA-PC-97-74 | 72.4 | W  | 0 | 7 | pT2C |
| GSM1323686 | VA-PC-99-54 | 59   | W  | 0 | 7 | pT2A |
| GSM1323687 | VA-PC-99-55 | 47.2 | B  | 0 | 7 | pT2C |
| GSM1323688 | VA-PC-99-75 | 54.4 | W  | 0 | 7 | pT2A |
| GSM1323689 | VA-PC-99-76 | 54.7 | W  | 0 | 7 | pT2C |
| GSM1323690 | VA-PC-99-77 | 55.9 | B  | 0 | 6 | pT2A |
| GSM1323691 | VA-PC-99-78 | 62.4 | B  | 0 | 7 | pT2A |
| GSM1323692 | VA-PC-99-79 | 64.8 | W  | 0 | 7 | pT2B |
| GSM1323693 | VA-PC-99-80 | 54.4 | B  | 0 | 7 | pT2C |
| GSM1323694 | VA-PC-99-81 | 65.6 | W  | 0 | 7 | pT2  |
| GSM1323695 | VA-PC-99-82 | 62.5 | W  | 0 | 7 | pT2C |
| GSM1323696 | VA-PC-99-83 | 50.4 | B  | 0 | 7 | pT2A |
| GSM1323697 | VA-PC-99-84 | 64.7 | W  | 0 | 6 | pT2A |
| GSM1323698 | MCC-PT197   | 66   | W  | 1 | 6 | pT1C |
| GSM1323699 | MCC-PT220   | 61.3 | W  | 1 | 6 | pT1C |
| GSM1323700 | MCC-PT264   | 60.1 | W  | 1 | 5 | NA   |
| GSM1323701 | UTPC004     | 71   | NA | 1 | 9 | pT1C |

|            |             |      |    |   |   |      |
|------------|-------------|------|----|---|---|------|
| GSM1323702 | UTPC004     | 71   | NA | 1 | 9 | pT1C |
| GSM1323703 | UTPC009     | 50   | NA | 1 | 7 | pT2B |
| GSM1323704 | UTPC009     | 50   | NA | 1 | 7 | pT2B |
| GSM1323705 | UTPC019     | 64   | NA | 1 | 7 | pT2A |
| GSM1323706 | UTPC019     | 64   | NA | 1 | 7 | pT2A |
| GSM1323707 | UTPC021     | 68   | NA | 1 | 7 | pT1C |
| GSM1323708 | UTPC021     | 68   | NA | 1 | 7 | pT1C |
| GSM1323709 | UTPC029     | 58   | NA | 1 | 7 | pT2A |
| GSM1323710 | UTPC029     | 58   | W  | 1 | 7 | pT2A |
| GSM1323711 | UTPC034     | 55   | NA | 1 | 7 | pT2B |
| GSM1323712 | UTPC034     | 55   | NA | 1 | 7 | pT2B |
| GSM1323713 | UTPC041     | 71   | NA | 1 | 7 | pT1C |
| GSM1323714 | UTPC058     | 65   | NA | 1 | 7 | pT2B |
| GSM1323715 | UTPC088     | 62   | NA | 1 | 6 | pT1C |
| GSM1323716 | UTPC093     | 58   | NA | 1 | 7 | pT2A |
| GSM1323717 | UTPC099     | 67   | NA | 1 | 9 | pT2B |
| GSM1323718 | UTPC101     | 70   | NA | 1 | 8 | pT3B |
| GSM1323719 | UTPC104     | 59   | NA | 1 | 7 | pT2A |
| GSM1323720 | UTPC110     | 53   | NA | 1 | 9 | pT2B |
| GSM1323721 | UTPC114     | 60   | NA | 1 | 7 | pT1C |
| GSM1323722 | UTPC116     | 60   | NA | 1 | 7 | pT2A |
| GSM1323723 | UTPC127     | 58   | NA | 1 | 7 | pT3B |
| GSM1323724 | UTPC131     | 51   | NA | 1 | 7 | pT3B |
| GSM1323725 | UTPC132     | 65   | NA | 1 | 7 | pT2A |
| GSM1323726 | UTPC141     | 74   | NA | 1 | 7 | pT2A |
| GSM1323727 | UTPC146     | 72   | W  | 1 | 8 | pT3B |
| GSM1323728 | UTPC147     | 66   | NA | 1 | 7 | pT2A |
| GSM1323729 | UTPC160     | 57   | NA | 1 | 7 | pT1C |
| GSM1323730 | UTPC164     | 66   | NA | 1 | 7 | pT2A |
| GSM1323731 | UTPC170     | 72   | NA | 1 | 7 | pT1C |
| GSM1323732 | VA-PC-00-86 | 59.6 | B  | 1 | 7 | pT3B |
| GSM1323733 | VA-PC-00-88 | 53.5 | B  | 1 | 7 | pT2C |
| GSM1323734 | VA-PC-00-96 | 58.4 | W  | 1 | 7 | pT2C |
| GSM1323735 | VA-PC-00-99 | 65.7 | B  | 1 | 7 | pT3A |
| GSM1323736 | VA-PC-90-4  | 59   | NA | 1 | 8 | pT3B |
| GSM1323737 | VA-PC-91-65 | 55   | B  | 1 | 9 | pT3B |
| GSM1323738 | VA-PC-92-11 | 63.9 | W  | 1 | 8 | pT3B |
| GSM1323739 | VA-PC-92-9  | 67.4 | W  | 1 | 7 | pT3B |
| GSM1323740 | VA-PC-93-20 | 52   | W  | 1 | 8 | pT2C |
| GSM1323741 | VA-PC-93-21 | 66.5 | W  | 1 | 7 | pT2C |
| GSM1323742 | VA-PC-93-24 | 66.6 | W  | 1 | 7 | pT2  |

|            |             |      |   |   |   |      |
|------------|-------------|------|---|---|---|------|
| GSM1323743 | VA-PC-94-71 | 64.8 | W | 1 | 8 | pT2C |
| GSM1323744 | VA-PC-95-34 | 62   | W | 1 | 7 | pT2C |
| GSM1323745 | VA-PC-95-37 | 57.7 | B | 1 | 7 | pT2C |
| GSM1323746 | VA-PC-95-41 | 58   | B | 1 | 7 | pT2C |
| GSM1323747 | VA-PC-95-42 | 66.8 | W | 1 | 7 | pT4  |
| GSM1323748 | VA-PC-96-43 | 61.8 | W | 1 | 7 | pT2C |
| GSM1323749 | VA-PC-96-44 | 51.8 | B | 1 | 7 | pT2C |
| GSM1323750 | VA-PC-97-46 | 58.6 | W | 1 | 7 | pT2C |
| GSM1323751 | VA-PC-98-53 | 61.6 | B | 1 | 8 | pT2A |
| GSM1323752 | VA-PC-99-85 | 56.9 | W | 1 | 7 | pT3A |

**Table S4.** List the genes that were significantly dysregulated in PCa patients with BCR AND showed significant differential expression in the opposite direction following FK866 treatment in our model systems, indicating that FK866 might be capable of reversing the input signature in the patient cohort.

| Patient Cohort (BCR = 1 vs BCR = 0) |                                   |                  |                  |                               | PCa Cells lines (FK866 treatment vs baseline) |                    |                       |                                      |
|-------------------------------------|-----------------------------------|------------------|------------------|-------------------------------|-----------------------------------------------|--------------------|-----------------------|--------------------------------------|
| Gene symbol                         | Fold change (BCR = 1 vs. BCR = 0) | LSMean (BCR = 1) | LSMean (BCR = 0) | P-value (BCR = 1 vs. BCR = 0) | Fold change (3nM FK866 vs. No treatment)      | LSMean (3nM FK866) | LSMean (No treatment) | P-value (3nM FK866 vs. No treatment) |
| SLX1B-SULT1A4                       | 1.74                              | 1.52             | 0.88             | 5.72E-03                      | −2.20                                         | 3.51               | 7.73                  | 1.07E-02                             |
| IFITM3                              | 1.73                              | 13.19            | 7.64             | 1.45E-03                      | −6.90                                         | 5.53               | 38.15                 | 3.17E-02                             |
| TMEM80                              | 1.37                              | 3.64             | 2.66             | 6.27E-03                      | −1.96                                         | 7.12               | 13.98                 | 3.09E-02                             |
| NPIPB12                             | 1.30                              | 6.12             | 4.71             | 3.02E-02                      | −1.58                                         | 9.77               | 15.48                 | 4.19E-02                             |
| LTB4R                               | 1.28                              | 4.41             | 3.43             | 2.28E-03                      | −2.79                                         | 5.90               | 16.48                 | 7.37E-03                             |
| ZC3H12A                             | 1.24                              | 11.91            | 9.59             | 4.22E-02                      | −3.23                                         | 3.34               | 10.78                 | 6.56E-03                             |
| TMEM120B                            | 1.23                              | 12.73            | 10.35            | 3.95E-02                      | −1.64                                         | 36.80              | 60.23                 | 2.32E-02                             |
| POGK                                | −1.11                             | 11.05            | 12.26            | 3.01E-02                      | 1.44                                          | 138.76             | 96.57                 | 3.42E-02                             |
| RPS6KA5                             | −1.14                             | 9.74             | 11.10            | 4.43E-02                      | 2.25                                          | 34.36              | 15.30                 | 3.51E-02                             |
| ZNF770                              | −1.20                             | 14.74            | 17.66            | 4.43E-02                      | 1.75                                          | 172.40             | 98.49                 | 1.57E-02                             |
| AKAP11                              | −1.21                             | 30.41            | 36.90            | 3.32E-04                      | 1.77                                          | 75.18              | 42.56                 | 3.86E-02                             |
| PROSER1                             | −1.22                             | 10.82            | 13.22            | 3.90E-03                      | 1.55                                          | 65.05              | 41.85                 | 4.81E-02                             |
| FERMT2                              | −1.23                             | 11.70            | 14.39            | 4.20E-02                      | 1.97                                          | 190.70             | 97.00                 | 1.34E-02                             |
| SPRED1                              | −1.23                             | 9.71             | 11.97            | 4.59E-02                      | 1.83                                          | 85.88              | 46.93                 | 2.26E-02                             |
| EIF5                                | −1.25                             | 29.42            | 36.77            | 8.90E-04                      | 1.72                                          | 829.98             | 482.60                | 2.91E-02                             |
| TRNT1                               | −1.26                             | 17.60            | 22.14            | 3.28E-02                      | 1.74                                          | 27.99              | 16.10                 | 1.87E-02                             |
| ARL5B                               | −1.33                             | 22.89            | 30.36            | 3.41E-03                      | 1.77                                          | 46.36              | 26.20                 | 3.67E-02                             |
| GABARAPL1                           | −1.33                             | 14.59            | 19.37            | 8.31E-05                      | 2.50                                          | 27.86              | 11.15                 | 2.17E-02                             |
| EML5                                | −1.34                             | 7.66             | 10.26            | 1.38E-02                      | 7.23                                          | 41.73              | 5.77                  | 8.91E-03                             |
| FBXL4                               | −1.37                             | 12.12            | 16.55            | 1.57E-02                      | 1.61                                          | 43.43              | 27.03                 | 3.74E-02                             |
